# Supplementary material for: Efficacy and Effect on Liver Functional Reserve of Atezolizumab and Bevacizumab for Unresectable Hepatocellular Carcinoma in Patients Who Do Not Meet Eligibility Criteria of IMbrave150
Source: MDPI journal article supplement (doi:10.3390/cancers14163938), 2022-08-15
Supplement: s1 [file s1]

**Supplementary Table S1**

|                                | <b>IMbrave150 in (n=43)</b> | <b>IMbrave150 out (n=72)</b> |
|--------------------------------|-----------------------------|------------------------------|
| Interruption of Atezo n, (%)   | 1 (2.3)                     | 16 (22.2)                    |
| Reason of Interruption (Atezo) |                             |                              |
| HCC rupture n, (%)             | 0 (0.0)                     | 2 (2.8)                      |
| Liver dysfunction n, (%)       | 0 (0.0)                     | 2 (2.8)                      |
| Fever up n, (%)                | 0 (0.0)                     | 2 (2.8)                      |
| Diarrhea n, (%)                | 0 (0.0)                     | 1 (1.4)                      |
| General fatigue n, (%)         | 0 (0.0)                     | 1 (1.4)                      |
| Pneumonia n, (%)               | 0 (0.0)                     | 1 (1.4)                      |
| Ascites n, (%)                 | 0 (0.0)                     | 1 (1.4)                      |
| Acute renal failure n, (%)     | 0 (0.0)                     | 1 (1.4)                      |
| Appetite loss n, (%)           | 1 (2.3)                     | 0 (0.0)                      |
| Unknown n, (%)                 | 0 (0.0)                     | 2 (2.8)                      |
| Others n, (%)                  | 0 (0.0)                     | 5 (6.9)                      |
| Interruption of Bev n, (%)     | 8 (18.6)                    | 22 (30.6)                    |
| Reason of Interruption (Bev)   |                             |                              |
| Proteinuria n, (%)             | 5 (11.6)                    | 5 (6.9)                      |
| Pneumonia n, (%)               | 0 (0.0)                     | 2 (2.8)                      |
| Fever up n, (%)                | 0 (0.0)                     | 2 (2.8)                      |
| Liver dysfunction n, (%)       | 0 (0.0)                     | 2 (2.8)                      |
| General fatigue n, (%)         | 0 (0.0)                     | 1 (1.4)                      |
| Thrombocytopenia n, (%)        | 0 (0.0)                     | 1 (1.4)                      |
| Diarrhea n, (%)                | 0 (0.0)                     | 1 (1.4)                      |

|                                |           |                           |
|--------------------------------|-----------|---------------------------|
| Hypertension n, (%)            | 0 (0.0)   | 1 (1.4)                   |
| Appetite loss n, (%)           | 1 (2.3)   | 0 (0.0)                   |
| Ascites n, (%)                 | 0 (0.0)   | 1 (1.4)                   |
| Acute renal failure n, (%)     | 0 (0.0)   | 1 (1.4)                   |
| Unknown n, (%)                 | 1 (2.3)   | 2 (2.8)                   |
| Others n, (%)                  | 1 (2.3)   | 4 (5.6)                   |
| <b>Child-Pugh A (n=106)</b>    |           | <b>Child-Pugh B (n=9)</b> |
| Interruption of Atezo n, (%)   | 13 (12.3) | 4 (44.4)                  |
| Reason of Interruption (Atezo) |           |                           |
| HCC rupture n, (%)             | 1 (0.9)   | 1 (11.1)                  |
| Liver dysfunction n, (%)       | 2 (1.9)   | 0 (0.0)                   |
| Fever up n, (%)                | 2 (1.9)   | 0 (0.0)                   |
| Diarrhea n, (%)                | 1 (0.9)   | 0 (0.0)                   |
| General fatigue n, (%)         | 0 (0.0)   | 1 (11.1)                  |
| Pneumonia n, (%)               | 1 (0.9)   | 0 (0.0)                   |
| Ascites n, (%)                 | 1 (0.9)   | 0 (0.0)                   |
| Acute renal failure n, (%)     | 1 (0.9)   | 0 (0.0)                   |
| Appetite loss n, (%)           | 1 (0.9)   | 0 (0.0)                   |
| Unknown n, (%)                 | 0 (0.0)   | 2 (22.2)                  |
| Others n, (%)                  | 5 (4.7)   | 0 (0.0)                   |
| Interruption of Bev n, (%)     | 26 (24.5) | 4 (44.4)                  |
| Reason of Interruption (Bev)   |           |                           |
| Proteinuria n, (%)             | 10 (9.4)  | 0 (0.0)                   |
| Pneumonia n, (%)               | 2 (1.9)   | 0 (0.0)                   |

|                                |                                                                              |                                                                            |
|--------------------------------|------------------------------------------------------------------------------|----------------------------------------------------------------------------|
| Fever up n, (%)                | 2 (1.9)                                                                      | 0 (0.0)                                                                    |
| Liver dysfunction n, (%)       | 2 (1.9)                                                                      | 0 (0.0)                                                                    |
| General fatigue n, (%)         | 0 (0.0)                                                                      | 1 (11.1)                                                                   |
| Thrombocytopenia n, (%)        | 0 (0.0)                                                                      | 1 (11.1)                                                                   |
| Diarrhea n, (%)                | 1 (0.9)                                                                      | 0 (0.0)                                                                    |
| Hypertension n, (%)            | 1 (0.9)                                                                      | 0 (0.0)                                                                    |
| Appetite loss n, (%)           | 1 (0.9)                                                                      | 0 (0.0)                                                                    |
| Ascites n, (%)                 | 1 (0.9)                                                                      | 0 (0.0)                                                                    |
| Acute renal failure n, (%)     | 1 (0.9)                                                                      | 0 (0.0)                                                                    |
| Unknown n, (%)                 | 1 (0.9)                                                                      | 2 (22.2)                                                                   |
| Others n, (%)                  | 5 (4.7)                                                                      | 0 (0.0)                                                                    |
| <hr/>                          |                                                                              |                                                                            |
|                                | <b>Platelet <math>\geq 7.5 \times 10^4</math> /<math>\mu</math>l (n=108)</b> | <b>Platelet <math>&lt; 7.5 \times 10^4</math> /<math>\mu</math>l (n=7)</b> |
| Interruption of Atezo n, (%)   | 14 (13.0)                                                                    | 3 (42.9)                                                                   |
| Reason of Interruption (Atezo) |                                                                              |                                                                            |
| HCC rupture n, (%)             | 2 (1.9)                                                                      | 0 (0.0)                                                                    |
| Liver dysfunction n, (%)       | 2 (1.9)                                                                      | 0 (0.0)                                                                    |
| Fever up n, (%)                | 2 (1.9)                                                                      | 0 (0.0)                                                                    |
| Diarrhea n, (%)                | 1 (0.9)                                                                      | 0 (0.0)                                                                    |
| General fatigue n, (%)         | 1 (0.9)                                                                      | 0 (0.0)                                                                    |
| Pneumonia n, (%)               | 1 (0.9)                                                                      | 0 (0.0)                                                                    |
| Ascites n, (%)                 | 1 (0.9)                                                                      | 0 (0.0)                                                                    |
| Acute renal failure n, (%)     | 1 (0.9)                                                                      | 0 (0.0)                                                                    |
| Appetite loss n, (%)           | 0 (0.0)                                                                      | 1 (14.3)                                                                   |
| Unknown n, (%)                 | 1 (0.9)                                                                      | 1 (14.3)                                                                   |

|                              |           |          |
|------------------------------|-----------|----------|
| Others n, (%)                | 4 (3.7)   | 1 (14.3) |
| Interruption of Bev n, (%)   | 26 (24.1) | 4 (57.1) |
| Reason of Interruption (Bev) |           |          |
| Proteinuria n, (%)           | 10 (9.3)  | 0 (0.0)  |
| Pneumonia n, (%)             | 2 (1.9)   | 0 (0.0)  |
| Fever up n, (%)              | 2 (1.9)   | 0 (0.0)  |
| Liver dysfunction n, (%)     | 2 (1.9)   | 0 (0.0)  |
| General fatigue n, (%)       | 1 (0.9)   | 0 (0.0)  |
| Thrombocytopenia n, (%)      | 0 (0.0)   | 1 (14.3) |
| Diarrhea n, (%)              | 1 (0.9)   | 0 (0.0)  |
| Hypertension n, (%)          | 1 (0.9)   | 0 (0.0)  |
| Appetite loss n, (%)         | 1 (0.9)   | 0 (0.0)  |
| Ascites n, (%)               | 0 (0.0)   | 1 (14.3) |
| Acute renal failure n, (%)   | 1 (0.9)   | 0 (0.0)  |
| Unknown n, (%)               | 2 (1.9)   | 1 (14.3) |
| Others n, (%)                | 4 (3.7)   | 1 (14.3) |

Atezo: Atezolizumab, Bev: bevacizumab

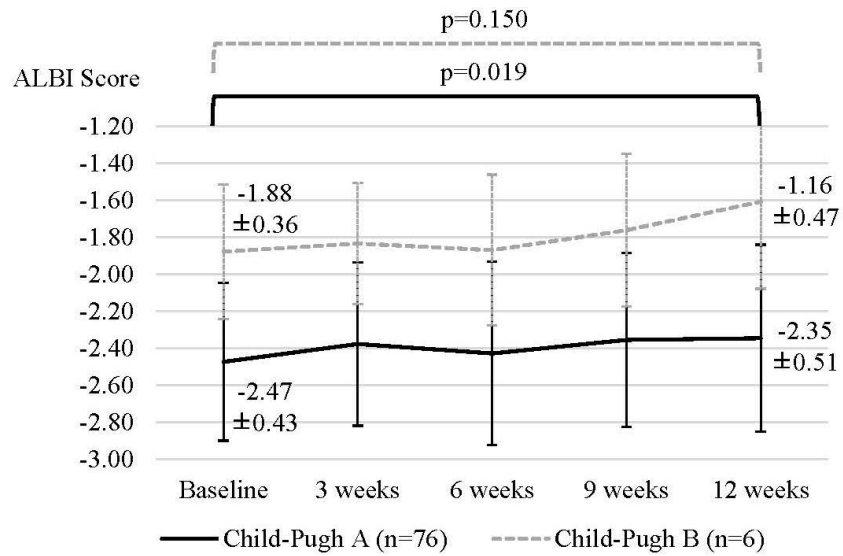

| mALBI grade         | Child-Pugh A | Child-Pugh B |
|---------------------|--------------|--------------|
| Non-deteriorated, n | 54           | 6            |
| Deteriorated, n     | 22           | 0            |
| p-value             | p=0.185      |              |

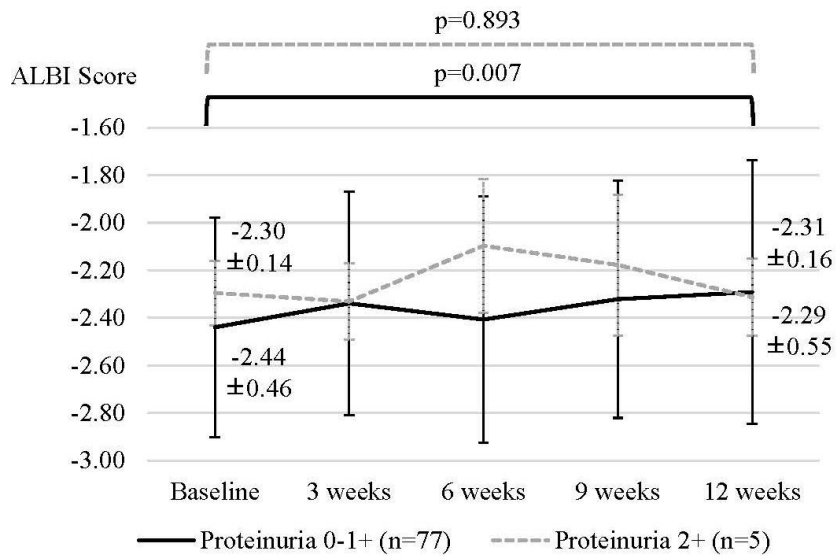

| mALBI grade         | Proteinuria 0-1+ | Proteinuria 2+ |
|---------------------|------------------|----------------|
| Non-deteriorated, n | 54               | 4              |
| Deteriorated, n     | 19               | 1              |
| p-value             | p=1.000          |                |

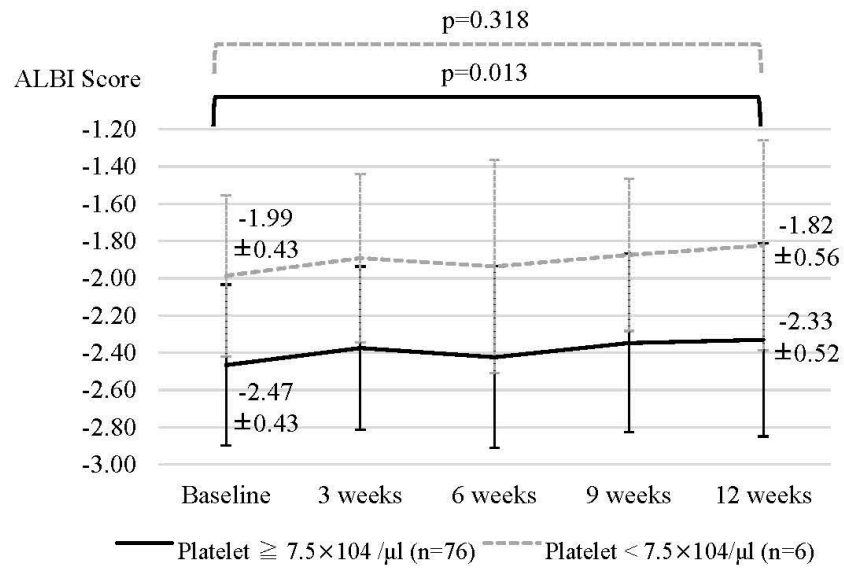

| mALBI grade         | Platelet $\geq 7.5 \times 10^4 / \mu$ | Platelet $< 7.5 \times 10^4 / \mu\text{l}$ |
|---------------------|---------------------------------------|--------------------------------------------|
| Non-deteriorated, n | 55                                    | 5                                          |
| Deteriorated, n     | 21                                    | 1                                          |
| p-value             | p=1.000                               |                                            |

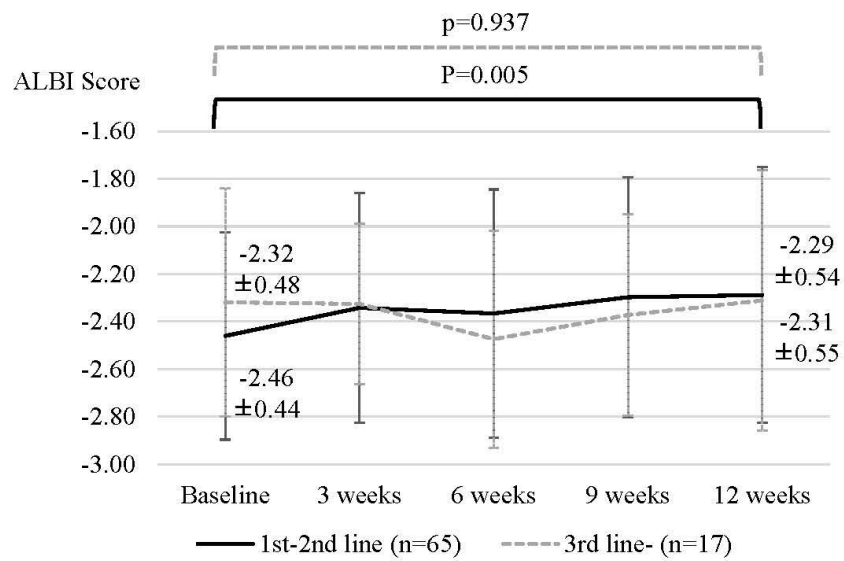

| mALBI grade         | 1 <sup>st</sup> -2 <sup>nd</sup> line | 3 <sup>rd</sup> line- |
|---------------------|---------------------------------------|-----------------------|
| Non-deteriorated, n | 46                                    | 14                    |
| Deteriorated, n     | 19                                    | 3                     |
| p-value             | p=0.539                               |                       |

**Figure S1.** Changes in the ALBI score and mALBI grade during atezolizumab and bevacizumab treatment for unresectable HCC in each subgroup. mALBI: modified albumin-bilirubin grade, BCLC: Barcelona Clinic Liver Cancer, mALBI: modified albumin-bilirubin grade, Vp: portal vein invasion.
